# Supplementary material for: Diurnal production of cortisol and prediction of treatment response in rheumatoid arthritis: a 6-month, real-life prospective cohort study
Source: HighWire-hosted journal article supplement (doi:10.1136/rmdopen-2023-003575), 2024-01-01
Supplement: rmdopen-2023-003575supp001_data_supplement.pdf [file rmdopen-2023-003575supp001_data_supplement.pdf]

## Supplementary material for

### **Diurnal Production of Cortisol and Prediction of Treatment Response in Rheumatoid Arthritis: a 6-month, Real-life Prospective Cohort Study**

Maria P. Yavropoulou<sup>1</sup>, Maria G. Filippa<sup>2</sup>, Nikolaos I. Vlachogiannis<sup>2</sup>, George E. Fragoulis<sup>2</sup>, Katerina Laskari<sup>2</sup>, Aimilia Mantzou<sup>3</sup>, Stylianos Panopoulos<sup>2</sup>, Antonis Fanouriakis<sup>2</sup>, Vasiliki-Kalliopi Bournia<sup>2</sup>, Gerasimos Evangelatos<sup>2</sup>, Aggeliki Papapanagiotou<sup>4</sup>, Maria G. Tektonidou<sup>2</sup>, George P. Chrousos<sup>3</sup>, Petros P. Sfikakis<sup>2</sup>

<sup>1</sup>:Endocrinology Unit, First Department of Propaedeutic and Internal Medicine, National and Kapodistrian University of Athens, Medical School, Athens, Greece

<sup>2</sup>:First Department of Propaedeutic and Internal Medicine and Joint Academic Rheumatology Program, National and Kapodistrian University of Athens, Medical School, Athens, Greece

<sup>3</sup>:University Research Institute of Maternal and Child Health and Precision Medicine and UNESCO Chair on Adolescent Health Care, National and Kapodistrian University of Athens, Medical School, Athens, Greece

<sup>4</sup>:Department of Biological Chemistry, National and Kapodistrian University of Athens, Medical School, Athens, Greece

#### *Correspondence*

Prof. Petros P. Sfikakis

First Department of Propaedeutic and Internal Medicine,

National and Kapodistrian University of Athens, Medical School, Athens, Greece

17 Agiou Thoma street, 11527, Goudi, LAIKO University Hospital, Athens, Greece

e-mail: [psfikakis@med.uoa.gr](mailto:psfikakis@med.uoa.gr)

## Supplementary Methods

### Cohort description

Baseline disease activity was moderate and high in 11 and 17 patients, respectively, with a mean DAS28-ESR of  $5.0 \pm 1.2$  (ranging from 3.7 to 7.25) [Tender joints: mean number: 11; range between 3-24; swollen joints: mean number: 5, range between 0-20; Vas-Patient: mean value: 6.3 range between 2-9].

Eighteen patients were started on csDMARDs alone +/- glucocorticoids, 6 patients received csDMARDs combined with bDMARD or tsDMARDs, whereas 4 patients received monotherapy with bDMARD or tsDMARDs. Twenty three out of the 28 patients were started on glucocorticoid treatment with a mean starting dose of 10 mg of prednisone or equivalent and a tapering dose of 2.5 mg prednisone or equivalent /3-4 weeks, aiming at discontinuation as soon as possible, as recommended [25].

At 6 months, 15/28 (53.6%) of the patients were on treatment with csDMARDs alone, or combined with bDMARD or tsDMARDs (7/28, 25%), whereas 6/28 (21.4%) of patients were receiving monotherapy with bDMARD or tsDMARDs. Of the 23 patients who started glucocorticoids at baseline, 8 and 10 had stopped at 3 and 6 months, respectively. The mean cumulative dose of prednisone or equivalent at 6 months was 231 mg. No significant differences were observed in saliva cortisol measurements at 6 months between these 23 patients who started glucocorticoids and those who did not.

### Sampling procedures and Assays

#### *Saliva cortisol measurements*

Saliva sampling was performed at home with +/-20 minutes variation of the prespecified time-point of the sampling, as instructed. The patients were provided with an illustrated step-by step guide of how to perform the saliva sampling procedure (available upon request).

Measurements were performed in several runs within 2 weeks after sampling due to restrictions in the long-term storage of saliva samples. Our laboratory has investigated the transferability of the reference range reported in the manufacturers' insert to our population by measuring saliva cortisol samples from 139 apparently healthy individuals aged 21 years and older at four time points during a day. Exclusion criteria were pregnancy, lactation, use of oral contraceptives and medication with cortisone/cortisol. The following reference values (95<sup>th</sup> percentile) were determined and no statistical difference was observed between males and

females. Morning hours (6 am -12-noon.): <21.5 nmol/L; Afternoon hours (4-8 pm): <6.6 nmol/L; Late night hours (10-12 pm); 5.7 nmol/L.

#### *Plasma ACTH measurements*

Blood sampling for ACTH measurements was performed one day before the saliva sampling at the clinic with a maximal variation of 2 hours (between 7.30 and 9.30 am) on EDTA tubes. After venipuncture the tubes were immediately immersed in an ice bath, and the centrifugation to separate plasma from cells was strictly performed within one hour after venipuncture in a refrigerated centrifuge. Plasma samples were then stored at -80 °C until further analysis. All plasma ACTH measurements were performed in one run.

The reference values of the assay, provided by the manufacturer were as follows: morning measurement: 1.9-11.4 pmol/L.

#### **Results from sub-group analyses**

Glucocorticoid-experienced patients displayed lower evening and night saliva cortisol measurements compared to glucocorticoid-naive patients (**Suppl. Table 1**). However, when accounting for differences in the disease duration the results no longer exhibited statistical significance (regression coefficient: 2.16, 95%CI: -0.76/5.1; and regression coefficient: 2.46, 95%CI: -0.52/5.4, respectively), probably highlighting an effect of the disease duration rather than a direct effect of the previous glucocorticoids treatment on the adrenal functional reserve.

**Suppl. Table 1. Comparisons of plasma ACTH and diurnal saliva cortisol levels between RA patients and healthy controls after adjustments for differences in the sex ratio between the 2 groups**

|                                                      | Regression coefficient | 95% CI      | P-value |
|------------------------------------------------------|------------------------|-------------|---------|
| Plasma ACTH (pmol/L)                                 | 0.2                    | -1.4 to 1.8 | 0.794   |
| Saliva Cortisol, 8am (nmol/L)                        | -0.1                   | -3.8 to 3.5 | 0.946   |
| Saliva Cortisol, 12-noon (nmol/L)                    | -0.1                   | -1.6 to 1.5 | 0.918   |
| Saliva Cortisol, 6pm (nmol/L)                        | 1.3                    | -0.2 to 2.9 | 0.089   |
| Saliva Cortisol, 10pm (nmol/L)                       | 1.9                    | 0.5 to 3.4  | 0.009   |
| Time integrated daily saliva cortisol production-AUC | 9.9                    | -8.2 to 28  | 0.278   |

The results presented are based on a linear regression model using sex as a confounding independent variable, in order to adjust for differences in the number of females between RA patients and healthy controls.

RA, Rheumatoid Arthritis; ACTH, adrenocorticotrophic hormone; AUC, area under the curve; CI, confidence interval

**Suppl. Table 2. Baseline saliva cortisol levels in seronegative versus seropositive RA patients**

|                                                       | Seronegative RA patients (n=13) | Seropositive RA patients (n=15) | P-value |
|-------------------------------------------------------|---------------------------------|---------------------------------|---------|
| Saliva Cortisol, 8am (nmol/L)                         | 13.9 ± 7.8                      | 16.3 ± 7.6                      | 0.185   |
| Saliva Cortisol, 12-noon (nmol/L)                     | 5.3 ± 1.9                       | 5.9 ± 3.2                       | 0.856   |
| Saliva Cortisol, 6pm (nmol/L)                         | 4.3 ± 4.4                       | 4.0 ± 2.8                       | 1.000   |
| Saliva Cortisol, 10pm (nmol/L)                        | 4.0 ± 3.0                       | 3.9 ± 4.0                       | 0.821   |
| Time integrated daily saliva cortisol production -AUC | 83.8 ± 38.0                     | 90.2 ± 38.3                     | 0.717   |

Values are shown as mean ± SD. Mann-Whitney U test was performed for comparisons between groups, as applicable.

RA, Rheumatoid Arthritis; AUC, area under the curve

**Suppl. Table 3. Baseline saliva cortisol levels in glucocorticoid-experienced versus glucocorticoid-naïve RA patients**

|                                                                  | <b>Glucocorticoid-experienced<br/>RA patients<br/>(n=15)</b> | <b>Glucocorticoid- naïve<br/>RA patients<br/>(n=13)</b> | <b>P-value</b> |
|------------------------------------------------------------------|--------------------------------------------------------------|---------------------------------------------------------|----------------|
| <b>Saliva Cortisol, 8am (nmol/L)</b>                             | 13.4 ± 6.3                                                   | 17.2 ± 8.7                                              | 0.294          |
| <b>Saliva Cortisol, 12-noon (nmol/L)</b>                         | 5.3 ± 2.2                                                    | 6.0 ± 3.1                                               | 0.751          |
| <b>Saliva Cortisol, 6pm (nmol/L)</b>                             | 2.9 ± 2.3                                                    | 5.6 ± 4.3                                               | 0.025          |
| <b>Saliva Cortisol, 10pm (nmol/L)</b>                            | 3.0 ± 3.2                                                    | 5.1 ± 3.6                                               | 0.005          |
| <b>Time integrated daily saliva<br/>cortisol production -AUC</b> | 73.8 ± 24.3                                                  | 102.7 ± 44.8                                            | 0.052          |
| <b>Disease duration, months</b>                                  | 117 ± 117                                                    | 28 ± 56                                                 | 0.002          |

Values are shown as mean ± SD. Mann-Whitney U test was performed for comparisons between groups, as applicable. RA, Rheumatoid Arthritis; AUC, area under the curve

**Suppl. Table 4. Circulating cortisol and ACTH levels at baseline in patients who did not achieve minimal disease activity at 6 months versus the rest of the RA patients**

|                                                              | <b>Patients not achieving minimal disease activity (n=10)</b> | <b>Patients achieving minimal disease activity (n=10)</b> | <b>P-value</b> |
|--------------------------------------------------------------|---------------------------------------------------------------|-----------------------------------------------------------|----------------|
| <b>Serum Cortisol (nmol/L)</b>                               | 257 ± 88                                                      | 300 ± 109                                                 | 0.345          |
| <b>Plasma ACTH (pmol/L)</b>                                  | 4.0 ± 1.8                                                     | 2.4 ± 0.4                                                 | 0.023          |
| <b>Cortisol/ACTH ratio</b>                                   | 72 ± 26                                                       | 128 ± 45                                                  | 0.004          |
| <b>Time-integrated daily saliva cortisol production -AUC</b> | 64 ± 17                                                       | 102 ± 51                                                  | 0.051          |

Values are shown as mean ± SD. Independent samples t-test (with or without Welch's correction) or Mann-Whitney U test was performed for comparisons between groups, as applicable.

RA, Rheumatoid Arthritis; ACTH, adrenocorticotrophic hormone; AUC, area under the curve

**Suppl. Table 5. Changes in diurnal saliva cortisol production, stress and depression rating scales and disease activity over time**

|                                                           | Baseline         | 3 months         | 6 months         | P-value          |
|-----------------------------------------------------------|------------------|------------------|------------------|------------------|
| <b>Saliva cortisol, 8am (nmol/L)</b>                      |                  |                  |                  |                  |
| MDA at 6 months                                           | 18.4 ± 8.2       | 17.0 ± 8.3       | 14.7 ± 6.5       | 0.789            |
| Non-MDA at 6 months                                       | 10.9 ± 4.0       | 13.9 ± 5.7       | 10.5 ± 4.5       | 0.368            |
| Whole cohort                                              | 15.2 ± 7.6       | 15.7 ± 7.4       | 12.9 ± 6.0       | 0.420            |
| <b>Saliva cortisol, 12-noon (nmol/L)</b>                  |                  |                  |                  |                  |
| MDA at 6 months                                           | 5.4 ± 2.5        | 5.3 ± 2.2        | 6.8 ± 6.1        | 0.751            |
| Non-MDA at 6 months                                       | 6.0 ± 2.9        | 5.5 ± 1.8        | 5.3 ± 2.7        | 0.490            |
| Whole cohort                                              | 5.6 ± 2.6        | 5.4 ± 2.0        | 6.2 ± 4.9        | 0.512            |
| <b>Saliva cortisol, 6pm (nmol/L)</b>                      |                  |                  |                  |                  |
| MDA at 6 months                                           | 5.2 ± 4.2        | 4.0 ± 2.6        | 3.6 ± 1.8        | 0.355            |
| Non-MDA at 6 months                                       | 2.7 ± 2.0        | 3.8 ± 2.2        | 2.4 ± 1.2        | 0.237            |
| Whole cohort                                              | 4.2 ± 3.6        | 3.9 ± 2.4        | 3.1 ± 1.7        | 0.190            |
| <b>Saliva cortisol, 10pm (nmol/L)</b>                     |                  |                  |                  |                  |
| MDA at 6 months                                           | 3.7 ± 2.7        | 2.5 ± 1.1        | 3.0 ± 2.2        | 0.624            |
| Non-MDA at 6 months                                       | 4.4 ± 4.5        | 2.1 ± 0.9        | 3.0 ± 3.8        | 0.228            |
| Whole cohort                                              | 4.0 ± 3.5        | 2.4 ± 1.0        | 3.0 ± 2.9        | 0.223            |
| <b>Time integrated daily saliva cortisol, (AUC)</b>       |                  |                  |                  |                  |
| MDA at 6 months                                           | 97 ± 41          | 86 ± 36          | 88 ± 45          | 0.424            |
| Non-MDA at 6 months                                       | 74 ± 29          | 76 ± 18          | 65 ± 24          | 0.717            |
| Whole cohort                                              | 87 ± 38          | 82 ± 30          | 78 ± 39          | 0.676            |
| <b>Perceived stress scale (Version PSS-14), severe, n</b> |                  |                  |                  |                  |
| MDA at 6 months                                           | 11/16            | 5/16             | 5/15             | 0.324            |
| Non-MDA at 6 months                                       | 8/12             | 7/12             | 5/11             | 0.211            |
| Whole cohort                                              | 19/28            | 12/28            | 10/26            | 0.208            |
| <b>Hamilton rating scale, moderate/severe, n</b>          |                  |                  |                  |                  |
| MDA at 6 months                                           | 6/16             | 5/16             | 5/15             | 0.131            |
| Non-MDA at 6 months                                       | 8/12             | 9/12             | 9/11             | 0.243            |
| Whole cohort                                              | 14/28            | 14/28            | 14/26            | 0.650            |
| <b>Serum CRP levels (mg/L)</b>                            |                  |                  |                  |                  |
| MDA at 6 months                                           | <b>23 ± 25</b>   | <b>2.8 ± 3.3</b> | <b>2.0 ± 1.8</b> | <b>0.002</b>     |
| Non-MDA at 6 months                                       | 30 ± 48          | 7.3 ± 8.7        | 3.9 ± 3.3        | 0.154            |
| Whole cohort                                              | <b>26 ± 36</b>   | <b>4.5 ± 6.2</b> | <b>2.8 ± 2.7</b> | <b>&lt;0.001</b> |
| <b>DAS28-ESR</b>                                          |                  |                  |                  |                  |
| MDA at 6 months                                           | <b>5.3 ± 1.1</b> | <b>2.7 ± 1.0</b> | <b>2.1 ± 0.6</b> | <b>&lt;0.001</b> |
| Non-MDA at 6 months                                       | <b>5.5 ± 0.9</b> | <b>4.0 ± 1.1</b> | <b>3.6 ± 0.5</b> | <b>0.002</b>     |
| Whole cohort                                              | <b>5.4 ± 1.0</b> | <b>3.2 ± 1.2</b> | <b>2.7 ± 0.9</b> | <b>&lt;0.001</b> |

Values are shown as mean ± SD. Categorical data are shown as absolute number.

Repeated measurements ANOVA or Friedman test was performed for comparisons between related measurements, as applicable. The Cochran-Mantel-Haenszel (CMH) test was used for comparisons of multiple related measurements of categorical data.

MDA, minimal disease activity; AUC, area under the curve; PSS, perceived stress scale; CRP, C-reactive protein; ESR, Erythrocyte sedimentation rate
